# Supplementary material for: Recognition of diazirine-modified O-GlcNAc by human O-GlcNAcase
Source: Royal Society of Chemistry journal article supplement (doi:10.1039/c4md00164h), 2014-01-01
Supplement: c4md00164h2.pdf [file c4md00164h2.pdf]

## Supporting Information for

### Recognition of diazirine-modified O-GlcNAc by human O-GlcNAcase

Andrea C. Rodriguez and Jennifer J. Kohler\*

Department of Biochemistry, University of Texas Southwestern Medical Center

\*corresponding author: [jennifer.kohler@utsouthwestern.edu](mailto:jennifer.kohler@utsouthwestern.edu)

| <u>Page</u> | <u>Contents</u>                                                                     |
|-------------|-------------------------------------------------------------------------------------|
| 2           | Figure S1. Purified recombinant proteins.                                           |
| 3           | Figure S2. Complete HPLC traces of peptide deglycosylation by wild-type OGA.        |
| 4           | Figure S3. Hydrolysis activity of bacterial lysates overexpressing OGA mutants.     |
| 5           | Figure S4. Initial rates of OGA and OGA mutant activity toward <i>p</i> NP-GlcNAc.  |
| 6           | Figure S5. Initial rates of OGA and OGA mutant activity toward <i>p</i> NP-GlcNDaz. |
| 7           | Figure S6. Complete HPLC traces of O-GlcNDaz peptide deglycosylation.               |

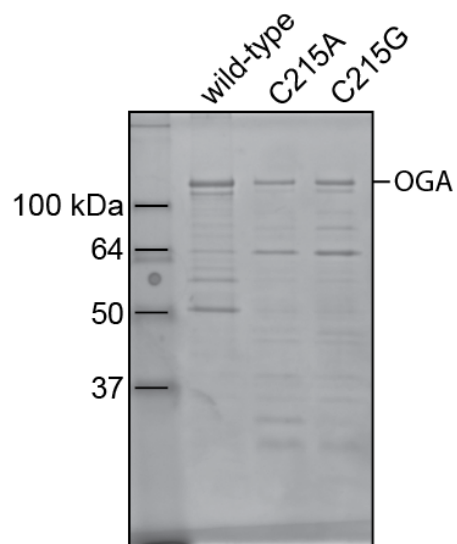

**Fig. S1. Purified recombinant proteins.** Recombinant OGA and OGA mutant proteins were expressed in *E. coli* and purified by IMAC chromatography. Eluted protein (7  $\mu$ g) was analyzed by SDS-PAGE with detection by Coomassie stain.

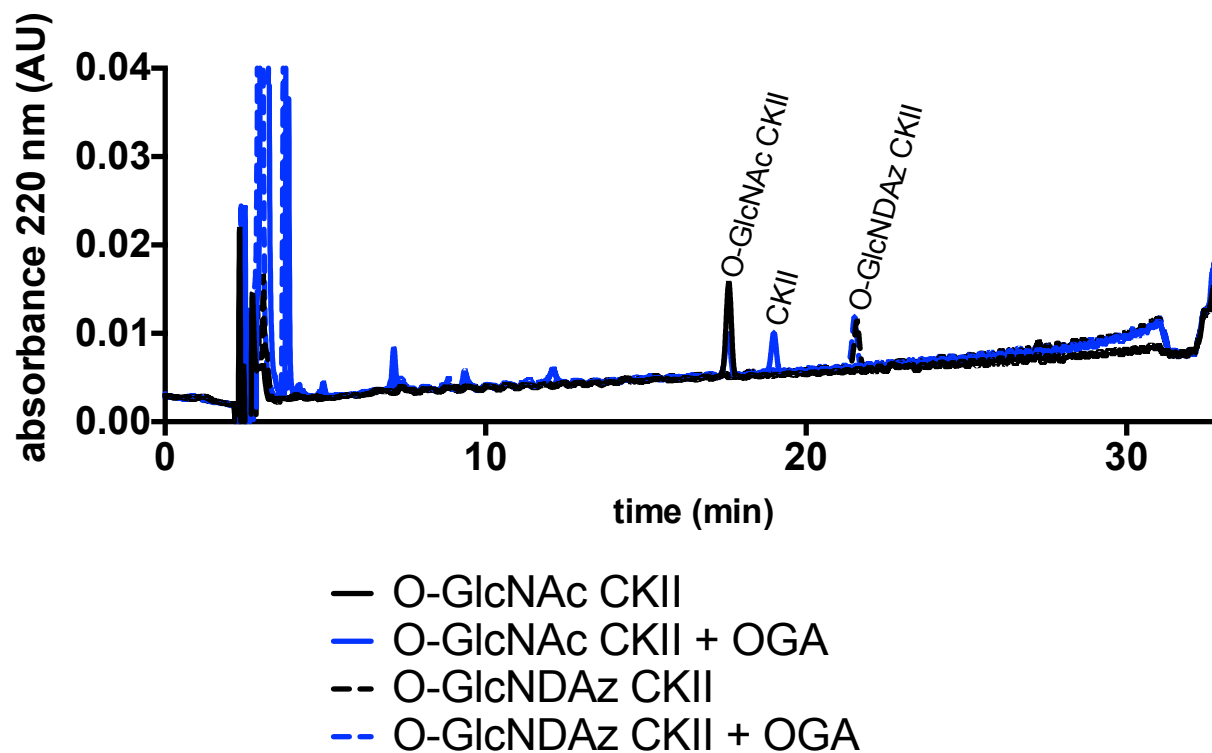

**Fig. S2. Complete HPLC traces of peptide deglycosylation by wild-type OGA.** CKII peptide was enzymatically modified with O-GlcNAc or O-GlcNDAz, as described in the methods section. Glycosylated peptides were incubated with or without wild-type OGA in 50 mM sodium cacodylate at pH 6.5, then analyzed by HPLC.

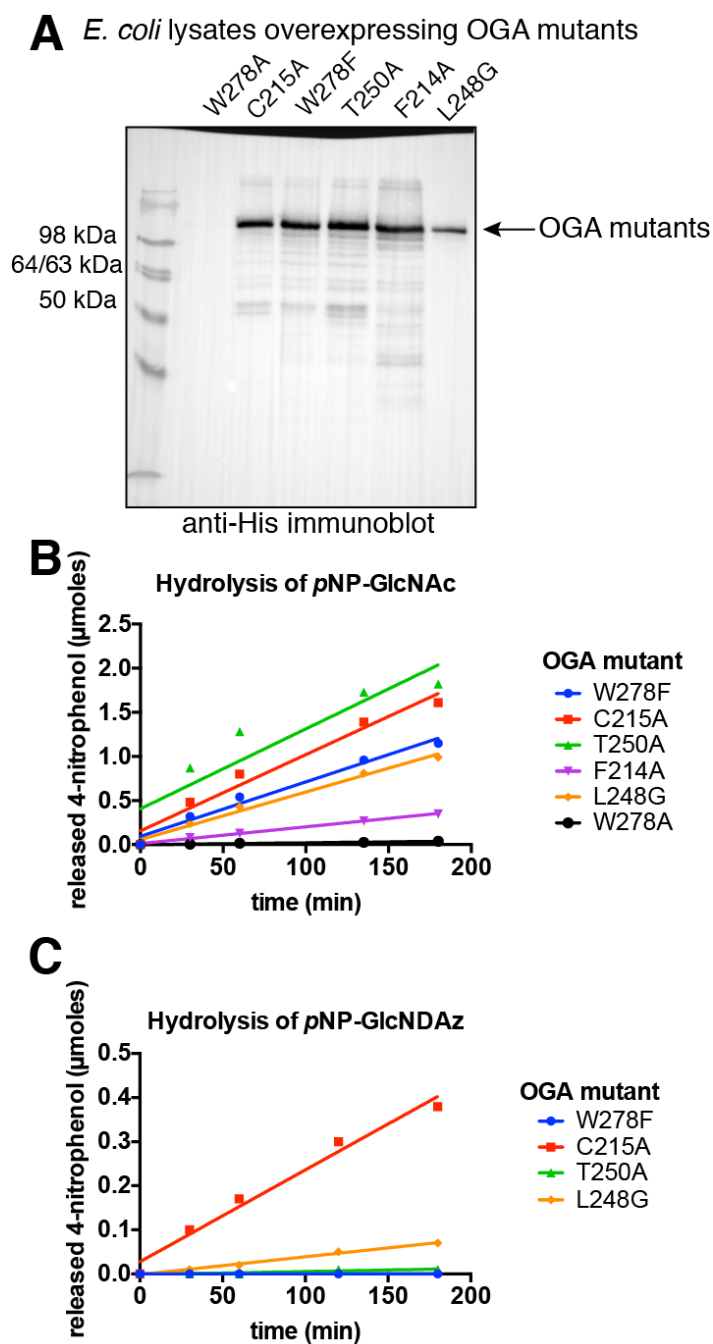

**Fig. S3. Hydrolysis activity of bacterial lysates overexpressing OGA mutants.** (A) OGA mutant expression in bacterial lysates was detected by immunoblot using an anti-His antibody. Lysates from bacteria overexpressing OGA mutants were incubated with *p*NP-GlcNAc (B) or *p*NP-GlcNDAz (C). Hydrolysis resulting in the release of 4-nitrophenol was monitored by measuring absorbance at 405 nm.

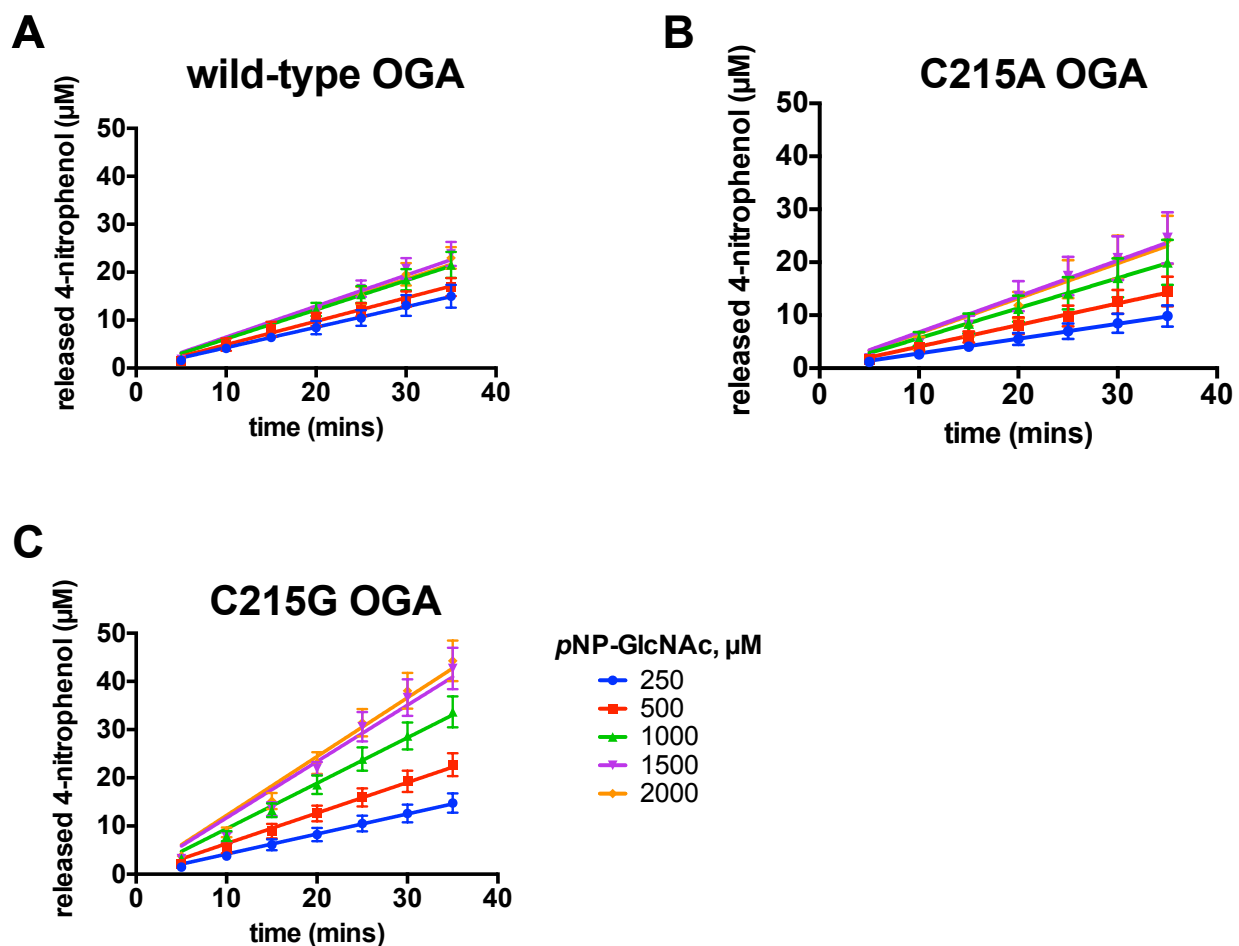

**Fig. S4. Initial rates of OGA and OGA mutant activity toward *p*NP-GlcNAc.** Recombinant wild-type OGA (A), OGA(C215A) (B), or OGA(C215G) (C) was incubated with *p*NP-GlcNAc. Concentrations of *p*NP-GlcNAc varied from 250 to 2000  $\mu\text{M}$ . Absorbance at 405 nm was measured in continuous assay format. The amount of released *p*NP was calculated by comparison to absorbance of a 4-nitrophenol standard measured in the same buffer.

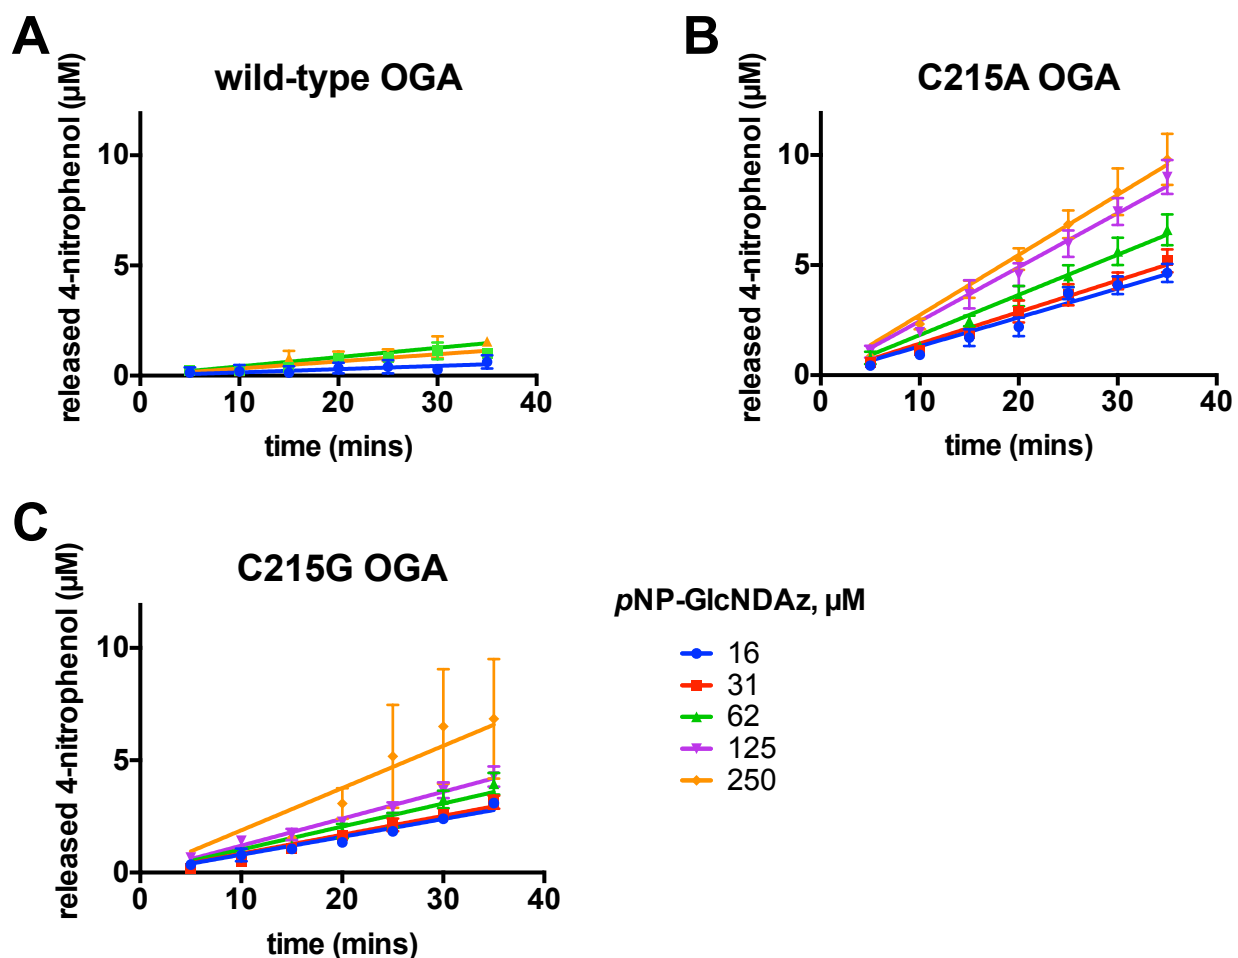

**Fig. S5. Initial rates of OGA and OGA mutant activity toward  $p\text{NP-GlcNDAz}$ .** Recombinant wild-type OGA (A), OGA(C215A) (B), or OGA(C215G) (C) was incubated with  $p\text{NP-GlcNDAz}$ . Concentrations of  $p\text{NP-GlcNDAz}$  varied from 16 to 250  $\mu\text{M}$ . Absorbance at 405 nm was measured in continuous assay format. The amount of released 4-nitrophenol was calculated by comparison to absorbance of a 4-nitrophenol standard measured in the same buffer.

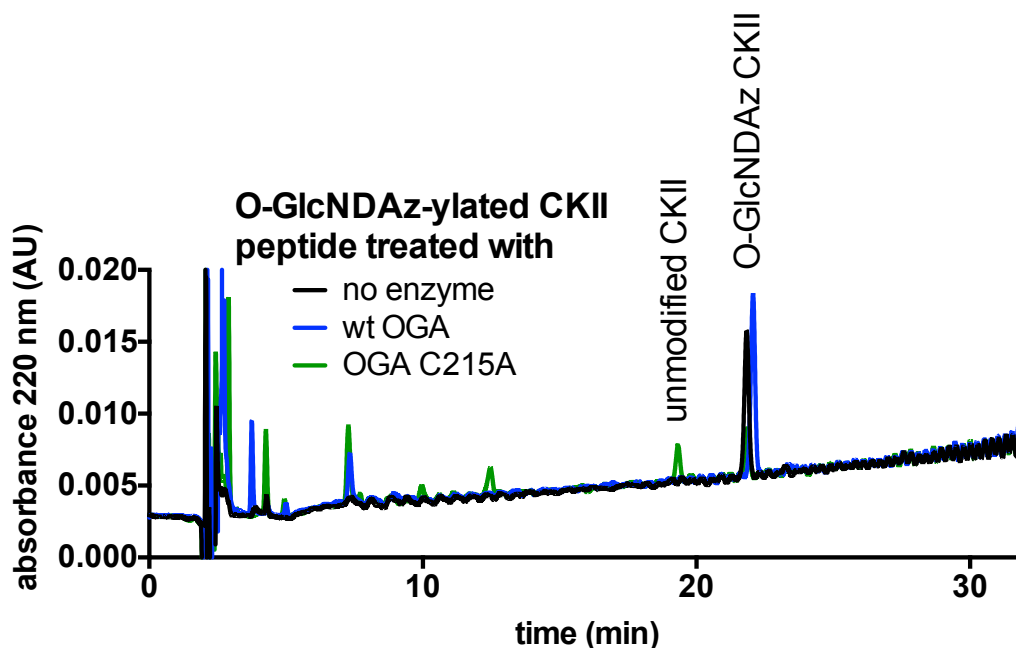

**Fig. S6. Complete HPLC traces of O-GlcNDAz peptide deglycosylation.** Purified CKII peptide was modified with O-GlcNDAz, as described in the methods section. O-GlcNDAz-ylated CKII was incubated in 50 mM sodium cacodylate at pH 6.5 with no enzyme, wild-type OGA, or OGA(C215A). Reaction products were analyzed by HPLC.
